# Supplementary material for: Possible Role of miR-375-3p in Cervical Lymph Node Metastasis of Oral Squamous Cell Carcinoma
Source: MDPI journal article supplement (doi:10.3390/cancers16081492), 2024-04-13
Supplement: s1 [file s1]

**Table S7.** GSEA in phenotype with miR-375-3p mimic.

| Gene sets                                         | NOM             | FDR             |
|---------------------------------------------------|-----------------|-----------------|
|                                                   | <i>P</i> -value | <i>q</i> -value |
| GOBP_POSITIVE_REGULATION_OF_GENE_EXPRESSION       | 0.000           | 0.060           |
| GOBP_RESPONSE_TO_ABIOTIC_STIMULUS                 | 0.006           | 0.681           |
| Gender GOBP_RESPONSE_TO_ABIOTIC_STIMULUS          | 0.006           | 0.497           |
| GOBP_SMALL_MOLECULE_METABOLIC_PROCESS             | 0.011           | 0.710           |
| GOBP_POSITIVE_REGULATION_OF_SIGNALING             | 0.009           | 0.848           |
| GOBP_NEGATIVE_REGULATION_OF_PROGRAMMED_CELL_DEATH | 0.043           | 1.000           |
| GOBP_ENDOMEMBRANE_SYSTEM_ORGANIZATION             | 0.043           | 1.000           |
| GOBP_TUBE_MORPHOGENESIS                           | 0.046           | 1.000           |

GSEA, Gene Set Enrichment Analysis; GOBP, Gene Ontology Biological Process; NOM, Nominal; FDR, False Discovery Rate
