# Supplementary material for: Possible Role of miR-375-3p in Cervical Lymph Node Metastasis of Oral Squamous Cell Carcinoma
Source: MDPI journal article supplement (doi:10.3390/cancers16081492), 2024-04-13
Supplement: s1 [file s1]

**Table S3.** Upregulated microRNAs in primary oral squamous cell carcinoma tissues.

| microRNA        | Fold change | <i>P</i> -value |
|-----------------|-------------|-----------------|
| hsa-miR-424-3p  | 9.76        | 8.09E-09        |
| hsa-miR-21-3p   | 7.85        | 8.09E-09        |
| hsa-miR-21-5p   | 5.33        | 2.21E-13        |
| hsa-miR-31-3p   | 4.20        | 3.53E-02        |
| hsa-miR-503-5p  | 4.14        | 8.69E-09        |
| hsa-miR-196a-5p | 3.65        | 2.64E-02        |
| hsa-miR-31-5p   | 3.62        | 1.27E-02        |
| hsa-miR-146b-5p | 3.40        | 2.51E-04        |
| hsa-miR-455-5p  | 2.87        | 3.39E-02        |
| hsa-miR-424-5p  | 2.83        | 1.61E-02        |
| hsa-miR-1290    | 2.63        | 4.70E-02        |
| hsa-miR-223-3p  | 2.61        | 8.81E-03        |
| hsa-miR-212-3p  | 2.59        | 2.31E-02        |
| hsa-miR-542-5p  | 2.58        | 8.24E-03        |
| hsa-miR-25-5p   | 2.47        | 3.79E-02        |
| hsa-miR-181d-5p | 2.40        | 1.80E-02        |
| hsa-miR-642a-3p | 2.38        | 9.54E-03        |
| hsa-miR-421     | 2.37        | 2.87E-02        |
| hsa-miR-431-5p  | 2.36        | 4.19E-02        |
| hsa-miR-1260a   | 2.35        | 2.91E-02        |
| hsa-miR-409-3p  | 2.23        | 3.32E-02        |
| hsa-miR-34c-3p  | 2.22        | 9.54E-03        |
| hsa-miR-455-3p  | 2.19        | 3.31E-03        |
| hsa-miR-181b-5p | 2.16        | 1.83E-03        |
| hsa-miR-130b-3p | 2.13        | 8.33E-03        |
| hsa-miR-3663-3p | 2.09        | 3.31E-03        |
| hsa-miR-4449    | 2.07        | 3.11E-02        |
| hsa-miR-1246    | 2.06        | 7.39E-03        |
| hsa-miR-4690-5p | 2.06        | 7.76E-03        |
| hsa-miR-766-3p  | 2.06        | 3.11E-02        |
| hsa-miR-181a-3p | 2.04        | 1.61E-02        |
| hsa-miR-4306    | 2.04        | 3.11E-02        |
| hsa-miR-485-3p  | 2.01        | 3.11E-02        |
