# Supplementary material for: Possible Role of miR-375-3p in Cervical Lymph Node Metastasis of Oral Squamous Cell Carcinoma
Source: MDPI journal article supplement (doi:10.3390/cancers16081492), 2024-04-13
Supplement: s1 [file s1]

**Table S2.** ON-TARGETplus small interfering RNAs specific for miR-375-3p target genes.

| Gene symbol | Gene name                                                       | Catalog number |
|-------------|-----------------------------------------------------------------|----------------|
| QKI         | Quaking homolog, KH domain RNA binding                          | L-024905-01    |
| MTDH        | Metadherin                                                      | L-018531-01    |
| YAP1        | Yes1 Associated Transcriptional Regulator                       | L-012200-00    |
| CBX3        | Chromobox homolog 3                                             | L-010033-00    |
| CHSY1       | Chondroitin sulfate synthase 1                                  | L-021339-01    |
| MAPKAP1     | Mitogen-activated protein kinase associated protein 1           | L-014315-00    |
| LDHB        | lactate dehydrogenase B                                         | L-009779-00    |
| UBE2E2      | ubiquitin-conjugating enzyme E2E 2                              | L-031782-00    |
| USP1        | ubiquitin specific peptidase 1                                  | L-006061-00    |
| C10orf26    | Chromosome 10 open reading frame 26                             | L-019421-02    |
| LSM12       | LSM12 homolog                                                   | L-015641-01    |
| PLEKHA3     | pleckstrin homology domain containing, family A member 3        | L-004319-01    |
| EBPL        | emopamil binding protein-like                                   | L-014920-01    |
| OGFOD1      | 2-oxoglutarate and iron-dependent oxygenase domain containing 1 | L-021197-01    |
| CORO2A      | coronin, actin binding protein, 2A                              | L-011420-00    |
| PTPMT1      | protein tyrosine phosphatase, mitochondrial 1                   | L-029988-01    |
| CSTF2       | cleavage stimulation factor, 3' pre-RNA, subunit 2, 64kDa       | L-011246-00    |
| POC1B       | POC1 centriolar protein homolog B                               | L-015667-01    |
| EIF4G3      | eukaryotic translation initiation factor 4 gamma, 3             | L-019530-00    |
| PPPDE2      | PPPDE peptidase domain containing 2                             | L-024576-02    |
| C1QBP       | complement component 1, q subcomponent binding protein          | L-011225-01    |
| RPN1        | ribophorin I                                                    | L-018903-01    |
| MBD2        | methyl-CpG binding domain protein 2                             | L-011555-00    |
| DCUN1D4     | DCN1, defective in cullin neddylation 1, domain containing 4    | L-014118-01    |
| TMEM55A     | transmembrane protein 55A                                       | L-013808-01    |
| ARL4C       | ADP-ribosylation factor-like 4C                                 | L-012398-00    |
| PRDX1       | peroxiredoxin 1                                                 | L-010338-00    |
| KIAA1524    | Cellular Inhibitor of PP2A                                      | L-014135-01    |
| MOBK1B      | MOB1, Mps One Binder kinase activator-like 1B                   | L-021097-00    |
| CNN3        | calponin 3, acidic                                              | L-011612-02    |

|        |                                                         |             |
|--------|---------------------------------------------------------|-------------|
| ASF1A  | ASF1 anti-silencing function 1 homolog A                | L-020222-02 |
| PDGFC  | platelet derived growth factor C                        | L-013154-01 |
| PAQR3  | progesterone and adipoQ receptor family member III      | L-008053-00 |
| CEPT1  | choline/ethanolamine phosphotransferase 1               | L-010350-01 |
| TIMM8A | translocase of inner mitochondrial membrane 8 homolog A | L-010342-00 |
| DEK    | DEK oncogene                                            | L-003881-00 |
| ATPAF1 | ATP synthase mitochondrial F1 complex assembly factor 1 | L-013738-01 |
