# Supplementary material for: Possible Role of miR-375-3p in Cervical Lymph Node Metastasis of Oral Squamous Cell Carcinoma
Source: MDPI journal article supplement (doi:10.3390/cancers16081492), 2024-04-13
Supplement: s1 [file s1]

**Table S4.** Downregulated microRNAs in primary oral squamous cell carcinoma tissues.

| microRNA          | Fold change | <i>P</i> -value |
|-------------------|-------------|-----------------|
| hsa-miR-375       | -53.98      | 1.62E-08        |
| hsa-miR-5580-3p   | -38.65      | 1.59E-14        |
| hsa-miR-617       | -16.72      | 6.23E-20        |
| hsa-miR-6746-5p   | -15.25      | 5.63E-06        |
| hsa-miR-451a      | -10.03      | 2.86E-03        |
| hsa-miR-3935      | -8.41       | 1.48E-07        |
| hsa-miR-1224-5p   | -8.33       | 2.41E-06        |
| hsa-miR-4462      | -7.87       | 4.76E-07        |
| hsa-miR-6875-5p   | -5.49       | 7.11E-05        |
| hsa-miR-6510-3p   | -5.31       | 2.78E-11        |
| hsa-miR-6504-3p   | -3.84       | 1.02E-05        |
| hsa-miR-6801-5p   | -3.83       | 2.64E-02        |
| hsa-miR-99a-5p    | -3.81       | 7.47E-05        |
| hsa-miR-6808-5p   | -3.73       | 1.01E-04        |
| hsa-miR-149-5p    | -3.62       | 2.98E-02        |
| hsa-miR-6762-5p   | -3.48       | 7.39E-03        |
| hsa-miR-125b-2-3p | -3.32       | 6.47E-03        |
| hsa-miR-486-5p    | -3.31       | 6.40E-03        |
| hsa-miR-4521      | -3.16       | 4.17E-02        |
| hsa-miR-6851-5p   | -3.03       | 5.07E-04        |
| hsa-miR-30a-5p    | -2.78       | 5.53E-04        |
| hsa-miR-101-3p    | -2.76       | 5.63E-06        |
| hsa-miR-6756-5p   | -2.59       | 1.41E-05        |
| hsa-miR-365b-5p   | -2.57       | 3.59E-02        |
| hsa-miR-376c-3p   | -2.53       | 2.93E-02        |
| hsa-miR-6086      | -2.49       | 8.16E-05        |
| hsa-miR-30a-3p    | -2.46       | 2.64E-02        |
| hsa-miR-411-5p    | -2.41       | 1.80E-02        |
| hsa-miR-100-5p    | -2.31       | 1.10E-02        |
| hsa-miR-203b-3p   | -2.29       | 3.41E-03        |
| hsa-miR-3065-5p   | -2.26       | 2.86E-03        |
| hsa-miR-4732-5p   | -2.19       | 2.64E-02        |
| hsa-miR-6777-3p   | -2.18       | 2.73E-05        |
| hsa-miR-4717-5p   | -2.17       | 3.65E-04        |

|                 |       |          |
|-----------------|-------|----------|
| hsa-miR-139-5p  | -2.15 | 4.97E-03 |
| hsa-miR-99a-3p  | -2.15 | 1.08E-05 |
| hsa-miR-27b-3p  | -2.13 | 5.52E-03 |
| hsa-miR-378c    | -2.12 | 7.43E-03 |
| hsa-miR-3911    | -2.11 | 1.62E-02 |
| hsa-miR-3065-3p | -2.11 | 2.50E-03 |
| hsa-miR-6880-5p | -2.10 | 1.15E-02 |
| hsa-miR-497-5p  | -2.08 | 3.35E-02 |
| hsa-miR-422a    | -2.05 | 3.31E-03 |
| hsa-miR-654-3p  | -2.05 | 4.78E-02 |
| hsa-miR-3613-5p | -2.04 | 3.11E-02 |
| hsa-miR-3194-5p | -2.04 | 2.23E-02 |
| hsa-miR-363-3p  | -2.04 | 3.39E-02 |
| hsa-miR-195-5p  | -2.03 | 1.15E-02 |
| hsa-miR-664a-5p | -2.01 | 3.35E-02 |
