# Supplementary material for: Possible Role of miR-375-3p in Cervical Lymph Node Metastasis of Oral Squamous Cell Carcinoma
Source: MDPI journal article supplement (doi:10.3390/cancers16081492), 2024-04-13
Supplement: s1 [file s1]

**Table S5.** Genes regulated by miR375-3p in human oral squamous cell carcinoma cells.

| Gene symbol | Gene name                                                          | Fold change | P-value |
|-------------|--------------------------------------------------------------------|-------------|---------|
| QKI         | quaking homolog, KH domain RNA binding                             | -9.93       | 0.0114  |
| SUB1        | SUB1 homolog                                                       | -7.83       | 0.0105  |
| PSIP1       | PC4 and SFRS1 interacting protein 1                                | -7.53       | 0.0115  |
| ASPH        | aspartate beta-hydroxylase                                         | -6.57       | 0.0114  |
| MTDH        | metadherin                                                         | -6.55       | 0.0202  |
| MAT2B       | methionine adenosyltransferase II, beta                            | -6.48       | 0.0105  |
| YAP1        | Yes-associated protein 1                                           | -5.54       | 0.0114  |
| TBC1D5      | TBC1 domain family, member 5                                       | -5.32       | 0.0114  |
| PGM2        | phosphoglucomutase 2                                               | -5.16       | 0.0114  |
| WWC2        | WW and C2 domain containing 2                                      | -5.00       | 0.0113  |
| CBX3        | chromobox homolog 3                                                | -4.91       | 0.0119  |
| CHSY1       | chondroitin sulfate synthase 1                                     | -4.84       | 0.0105  |
| ELOVL6      | ELOVL family member 6, elongation of long chain fatty acids        | -4.83       | 0.0136  |
| EIF2S1      | eukaryotic translation initiation factor 2, subunit 1 alpha, 35kDa | -4.77       | 0.0105  |
| CLVS1       | clavesin 1                                                         | -4.74       | 0.0113  |
| MAPKAP1     | mitogen-activated protein kinase associated protein 1              | -4.51       | 0.0140  |
| HDHD1A      | haloacid dehalogenase-like hydrolase domain containing 1A          | -4.47       | 0.0114  |
| LDHB        | lactate dehydrogenase B                                            | -4.24       | 0.0142  |
| UBE2E2      | ubiquitin-conjugating enzyme E2E 2                                 | -4.17       | 0.0105  |
| SGMS2       | sphingomyelin synthase 2                                           | -4.15       | 0.0136  |
| ACSL3       | acyl-CoA synthetase long-chain family member 3                     | -4.11       | 0.0105  |
| SEC23A      | Sec23 homolog A                                                    | -4.08       | 0.0114  |
| TMX3        | thioredoxin-related transmembrane protein 3                        | -4.06       | 0.0122  |
| FAM36A      | family with sequence similarity 36, member A                       | -4.00       | 0.0150  |
| EIF5A2      | eukaryotic translation initiation factor 5A2                       | -3.99       | 0.0181  |
| NT5E        | 5'-nucleotidase, ecto                                              | -3.95       | 0.0187  |
| CHST11      | carbohydrate sulfotransferase 11                                   | -3.87       | 0.0115  |
| ME1         | malic enzyme 1, NADP(+)-dependent, cytosolic                       | -3.87       | 0.0153  |
| THBS1       | thrombospondin 1                                                   | -3.85       | 0.0358  |

|          |                                                                                          |       |        |
|----------|------------------------------------------------------------------------------------------|-------|--------|
| YWHAZ    | tyrosine 3-monooxygenase/tryptophan 5-monooxygenase activation protein, zeta polypeptide | -3.85 | 0.0144 |
| GOLGA4   | golgin A4                                                                                | -3.84 | 0.0114 |
| USP1     | ubiquitin specific peptidase 1                                                           | -3.81 | 0.0226 |
| RBPJ     | recombination signal binding protein for immunoglobulin kappa J region                   | -3.80 | 0.0114 |
| SEMA3C   | sema domain, immunoglobulin domain, short basic domain, secreted, 3C                     | -3.78 | 0.0191 |
| MAL2     | mal, T-cell differentiation protein 2                                                    | -3.73 | 0.0114 |
| C10orf26 | chromosome 10 open reading frame 26                                                      | -3.72 | 0.0114 |
| MPP5     | membrane protein, palmitoylated 5                                                        | -3.67 | 0.0191 |
| LSM12    | LSM12 homolog                                                                            | -3.57 | 0.0119 |
| PLEKHA3  | pleckstrin homology domain containing, family A member 3                                 | -3.48 | 0.0105 |
| CDCA7L   | cell division cycle associated 7-like                                                    | -3.48 | 0.0237 |
| RCN2     | reticulocalbin 2, EF-hand calcium binding domain                                         | -3.45 | 0.0181 |
| EBPL     | emopamil binding protein-like                                                            | -3.42 | 0.0142 |
| BCL10    | B-cell CLL/lymphoma 10                                                                   | -3.38 | 0.0113 |
| MLEC     | malectin                                                                                 | -3.35 | 0.0234 |
| SKP2     | S-phase kinase-associated protein 2                                                      | -3.32 | 0.0224 |
| TH1L     | TH1-like                                                                                 | -3.31 | 0.0229 |
| EFTUD2   | elongation factor Tu GTP binding domain containing 2                                     | -3.30 | 0.0181 |
| TTC7B    | tetratricopeptide repeat domain 7B                                                       | -3.29 | 0.0153 |
| DPY19L1  | dpy-19-like 1                                                                            | -3.23 | 0.0147 |
| CRIM1    | cysteine rich transmembrane BMP regulator 1                                              | -3.21 | 0.0276 |
| OGFOD1   | 2-oxoglutarate and iron-dependent oxygenase domain containing 1                          | -3.18 | 0.0114 |
| REEP3    | receptor accessory protein 3                                                             | -3.18 | 0.0153 |
| FST      | follistatin                                                                              | -3.17 | 0.0463 |
| FGFR1OP2 | FGFR1 oncogene partner 2                                                                 | -3.17 | 0.0114 |
| KRT6A    | keratin 6A                                                                               | -3.17 | 0.0294 |
| CCDC88A  | coiled-coil domain containing 88A                                                        | -3.17 | 0.0181 |
| NIN      | ninein                                                                                   | -3.15 | 0.0129 |

|           |                                                           |       |        |
|-----------|-----------------------------------------------------------|-------|--------|
| ASAP2     | ArfGAP with SH3 domain, ankyrin repeat and PH domain 2    | -3.13 | 0.0113 |
| BIRC5     | baculoviral IAP repeat-containing 5                       | -3.12 | 0.0207 |
| C3orf63   | chromosome 3 open reading frame 63                        | -3.11 | 0.0140 |
| PHTF2     | putative homeodomain transcription factor 2               | -3.10 | 0.0285 |
| C14orf149 | chromosome 14 open reading frame 149                      | -3.10 | 0.0113 |
| CORO1C    | coronin, actin binding protein, 1C                        | -3.10 | 0.0150 |
| USP10     | ubiquitin specific peptidase 10                           | -3.08 | 0.0211 |
| CORO2A    | coronin, actin binding protein, 2A                        | -3.08 | 0.0245 |
| SAMD9     | sterile alpha motif domain containing 9                   | -3.07 | 0.0123 |
| TMEM194A  | transmembrane protein 194A                                | -3.02 | 0.0328 |
| GOLIM4    | golgi integral membrane protein 4                         | -3.00 | 0.0231 |
| PGRMC1    | progesterone receptor membrane component 1                | -2.98 | 0.0147 |
| PTPMT1    | protein tyrosine phosphatase, mitochondrial 1             | -2.93 | 0.0181 |
| TMEM33    | transmembrane protein 33                                  | -2.93 | 0.0105 |
| CSTF2     | cleavage stimulation factor, 3' pre-RNA, subunit 2, 64kDa | -2.92 | 0.0156 |
| TYMS      | thymidylate synthetase                                    | -2.91 | 0.0378 |
| SETD7     | SET domain containing 7                                   | -2.90 | 0.0136 |
| SPAG9     | sperm associated antigen 9                                | -2.90 | 0.0113 |
| TRIM6     | tripartite motif-containing 6                             | -2.90 | 0.0214 |
| CENPF     | centromere protein F, 350/400ka                           | -2.89 | 0.0298 |
| RSU1      | Ras suppressor protein 1                                  | -2.89 | 0.0114 |
| POC1B     | POC1 centriolar protein homolog B                         | -2.89 | 0.0122 |
| EBAG9     | estrogen receptor binding site associated, antigen, 9     | -2.88 | 0.0129 |
| FAM3C     | family with sequence similarity 3, member C               | -2.88 | 0.0219 |
| EIF4G3    | eukaryotic translation initiation factor 4 gamma, 3       | -2.88 | 0.0105 |
| KPNA4     | karyopherin alpha 4                                       | -2.87 | 0.0168 |
| PTPN12    | protein tyrosine phosphatase, non-receptor type 12        | -2.85 | 0.0117 |
| ENAH      | enabled homolog                                           | -2.82 | 0.0224 |
| CNN2      | calponin 2                                                | -2.82 | 0.0265 |
| SYNJ2BP   | synaptojanin 2 binding protein                            | -2.80 | 0.0105 |

|          |                                                             |       |        |
|----------|-------------------------------------------------------------|-------|--------|
| CHPT1    | choline phosphotransferase 1                                | -2.78 | 0.0114 |
| XPR1     | xenotropic and polytropic retrovirus receptor<br>1          | -2.76 | 0.0126 |
| PPPDE2   | PPPDE peptidase domain containing 2                         | -2.76 | 0.0144 |
| UBE3A    | ubiquitin protein ligase E3A                                | -2.76 | 0.0144 |
| RASSF8   | Ras association domain family member 8                      | -2.75 | 0.0113 |
| SAR1A    | SAR1 homolog A                                              | -2.74 | 0.0114 |
| C12orf29 | chromosome 12 open reading frame 29                         | -2.74 | 0.0173 |
| TMEM19   | transmembrane protein 19                                    | -2.74 | 0.0224 |
| SKA2     | spindle and kinetochore associated complex<br>subunit 2     | -2.73 | 0.0219 |
| C13orf37 | chromosome 13 open reading frame 37                         | -2.73 | 0.0274 |
| ARHGAP18 | Rho GTPase activating protein 18                            | -2.73 | 0.0123 |
| OPA1     | optic atrophy 1                                             | -2.72 | 0.0114 |
| KIAA1191 | KIAA1191                                                    | -2.72 | 0.0105 |
| TPR      | translocated promoter region                                | -2.70 | 0.0153 |
| CDR2     | cerebellar degeneration-related protein 2,<br>62kDa         | -2.70 | 0.0159 |
| COPS8    | COP9 constitutive photomorphogenic<br>homolog subunit 8     | -2.70 | 0.0142 |
| C1QBP    | complement component 1, q subcomponent<br>binding protein   | -2.68 | 0.0179 |
| RPN1     | ribophorin I                                                | -2.67 | 0.0286 |
| CCDC91   | coiled-coil domain containing 91                            | -2.67 | 0.0115 |
| LMAN1    | lectin, mannose-binding, 1                                  | -2.66 | 0.0243 |
| ITGA6    | integrin, alpha 6                                           | -2.65 | 0.0140 |
| NUS1     | nuclear undecaprenyl pyrophosphate synthase<br>1 homolog    | -2.65 | 0.0232 |
| FGFBP1   | fibroblast growth factor binding protein 1                  | -2.65 | 0.0444 |
| WTAP     | Wilms tumor 1 associated protein                            | -2.64 | 0.0294 |
| MBD2     | methyl-CpG binding domain protein 2                         | -2.63 | 0.0134 |
| GFM2     | G elongation factor, mitochondrial 2                        | -2.63 | 0.0153 |
| TIMM17A  | translocase of inner mitochondrial membrane<br>17 homolog A | -2.62 | 0.0150 |
| USP46    | ubiquitin specific peptidase 46                             | -2.62 | 0.0343 |
| POLR3G   | polymerase III polypeptide G                                | -2.62 | 0.0114 |

|          |                                                                                                      |       |        |
|----------|------------------------------------------------------------------------------------------------------|-------|--------|
| SP100    | SP100 nuclear antigen                                                                                | -2.62 | 0.0114 |
| DDX18    | DEAD box polypeptide 18                                                                              | -2.61 | 0.0179 |
| DAZAP2   | DAZ associated protein 2                                                                             | -2.60 | 0.0114 |
| MYBL1    | v-myb myeloblastosis viral oncogene homolog-like 1                                                   | -2.58 | 0.0334 |
| KCTD10   | potassium channel tetramerisation domain containing 10                                               | -2.56 | 0.0140 |
| PODXL    | podocalyxin-like                                                                                     | -2.55 | 0.0296 |
| DCUN1D4  | DCN1, defective in cullin neddylation 1, domain containing 4                                         | -2.55 | 0.0142 |
| DIS3     | DIS3 mitotic control homolog                                                                         | -2.52 | 0.0114 |
| DST      | dystonin                                                                                             | -2.51 | 0.0156 |
| ENOPH1   | enolase-phosphatase 1                                                                                | -2.51 | 0.0144 |
| MYH10    | myosin, heavy chain 10, non-muscle                                                                   | -2.51 | 0.0169 |
| C1orf96  | chromosome 1 open reading frame 96                                                                   | -2.51 | 0.0114 |
| NETO2    | neuropilin and tolloid-like 2                                                                        | -2.48 | 0.0219 |
| PPP1R2   | protein phosphatase 1, regulatory subunit 2                                                          | -2.48 | 0.0130 |
| PEBP1    | phosphatidylethanolamine binding protein 1                                                           | -2.47 | 0.0193 |
| SLC35B4  | solute carrier family 35, member B4                                                                  | -2.47 | 0.0185 |
| WTAP     | Wilms tumor 1 associated protein                                                                     | -2.45 | 0.0304 |
| TMEM55A  | transmembrane protein 55A                                                                            | -2.45 | 0.0114 |
| SYNCRIP  | synaptotagmin binding, cytoplasmic RNA interacting protein                                           | -2.44 | 0.0191 |
| NF1      | neurofibromin 1                                                                                      | -2.43 | 0.0125 |
| SMYD2    | SET and MYND domain containing 2                                                                     | -2.42 | 0.0117 |
| TCF12    | transcription factor 12                                                                              | -2.41 | 0.0194 |
| AMMECR1  | Alport syndrome, mental retardation, midface hypoplasia and elliptocytosis chromosomal region gene 1 | -2.41 | 0.0269 |
| SH3D19   | SH3 domain containing 19                                                                             | -2.41 | 0.0267 |
| MRPL19   | mitochondrial ribosomal protein L19                                                                  | -2.41 | 0.0114 |
| SLC25A40 | solute carrier family 25, member 40                                                                  | -2.40 | 0.0150 |
| ARL4C    | ADP-ribosylation factor-like 4C                                                                      | -2.40 | 0.0114 |
| BNC1     | basenuclin 1                                                                                         | -2.38 | 0.0117 |
| RER1     | RER1 retention in endoplasmic reticulum 1 homolog                                                    | -2.37 | 0.0122 |

|          |                                                      |       |        |
|----------|------------------------------------------------------|-------|--------|
| SGOL2    | shugoshin-like 2                                     | -2.37 | 0.0262 |
| PTP4A2   | protein tyrosine phosphatase type IVA,<br>member 2   | -2.37 | 0.0165 |
| WWTR1    | WW domain containing transcription regulator<br>1    | -2.37 | 0.0156 |
| INSIG2   | insulin induced gene 2                               | -2.36 | 0.0150 |
| UNC13B   | unc-13 homolog B                                     | -2.36 | 0.0169 |
| UHRF1    | ubiquitin-like with PHD and ring finger<br>domains 1 | -2.36 | 0.0445 |
| GPD1L    | glycerol-3-phosphate dehydrogenase 1-like            | -2.36 | 0.0181 |
| SNX6     | sorting nexin 6                                      | -2.35 | 0.0196 |
| EEA1     | early endosome antigen 1                             | -2.35 | 0.0144 |
| TUBGCP3  | tubulin, gamma complex associated protein 3          | -2.34 | 0.0237 |
| OTUD6B   | OTU domain containing 6B                             | -2.33 | 0.0294 |
| CTBP2    | C-terminal binding protein 2                         | -2.33 | 0.0105 |
| GCSH     | glycine cleavage system protein H                    | -2.33 | 0.0456 |
| FAM63B   | family with sequence similarity 63, member B         | -2.32 | 0.0182 |
| TAOK3    | TAO kinase 3                                         | -2.32 | 0.0113 |
| FRMD6    | FERM domain containing 6                             | -2.31 | 0.0140 |
| DERL1    | Der1-like domain family, member 1                    | -2.31 | 0.0122 |
| KLHL7    | kelch-like 7                                         | -2.30 | 0.0182 |
| AK3L1    | adenylate kinase 3-like 1                            | -2.30 | 0.0229 |
| PRDX1    | peroxiredoxin 1                                      | -2.30 | 0.0144 |
| EMB      | embigin homolog                                      | -2.30 | 0.0156 |
| CLTB     | clathrin, light chain B                              | -2.29 | 0.0341 |
| RAB21    | RAB21, member RAS oncogene family                    | -2.29 | 0.0114 |
| OSBPL8   | oxysterol binding protein-like 8                     | -2.29 | 0.0274 |
| AIM1     | absent in melanoma 1                                 | -2.28 | 0.0125 |
| PRIM2    | primase, DNA, polypeptide 2                          | -2.28 | 0.0217 |
| KDSR     | 3-ketodihydrosphingosine reductase                   | -2.28 | 0.0105 |
| MAP2K4   | mitogen-activated protein kinase kinase 4            | -2.27 | 0.0219 |
| VGLL4    | vestigial like 4                                     | -2.27 | 0.0130 |
| BAG4     | BCL2-associated athanogene 4                         | -2.26 | 0.0142 |
| RRP1B    | ribosomal RNA processing 1 homolog B                 | -2.25 | 0.0147 |
| RAPGEF1  | Rap guanine nucleotide exchange factor 1             | -2.25 | 0.0145 |
| KIAA1524 | KIAA1524                                             | -2.25 | 0.0344 |

|          |                                                                           |       |        |
|----------|---------------------------------------------------------------------------|-------|--------|
| SERTAD2  | SERTA domain containing 2                                                 | -2.25 | 0.0114 |
| USP31    | ubiquitin specific peptidase 31                                           | -2.24 | 0.0118 |
| WDR1     | WD repeat domain 1                                                        | -2.24 | 0.0166 |
| CHIC1    | cysteine-rich hydrophobic domain 1                                        | -2.24 | 0.0117 |
| MBNL1    | muscleblind-like                                                          | -2.23 | 0.0114 |
| PRDX3    | peroxiredoxin 3                                                           | -2.23 | 0.0243 |
| TMEFF1   | transmembrane protein with EGF-like and two<br>follistatin-like domains 1 | -2.23 | 0.0401 |
| AREG     | amphiregulin                                                              | -2.22 | 0.0175 |
| ACSL4    | acyl-CoA synthetase long-chain family member<br>4                         | -2.22 | 0.0114 |
| CTPS     | CTP synthase                                                              | -2.22 | 0.0140 |
| NOM1     | nucleolar protein with MIF4G domain 1                                     | -2.21 | 0.0114 |
| MOBK1B   | MOB1, Mps One Binder kinase activator-like<br>1B                          | -2.21 | 0.0114 |
| BBX      | bobby sox homolog                                                         | -2.20 | 0.0180 |
| SET      | SET nuclear oncogene                                                      | -2.20 | 0.0165 |
| PRRG1    | proline rich Gla 1                                                        | -2.19 | 0.0439 |
| HRSP12   | heat-responsive protein 12                                                | -2.19 | 0.0339 |
| HELLS    | helicase, lymphoid-specific                                               | -2.19 | 0.0322 |
| PAFAH1B1 | platelet-activating factor acetylhydrolase 1b,<br>regulatory subunit 1    | -2.19 | 0.0154 |
| LANCL1   | LanC lantibiotic synthetase component C-like 1                            | -2.19 | 0.0113 |
| CNN3     | calponin 3, acidic                                                        | -2.19 | 0.0344 |
| FAM82A2  | family with sequence similarity 82, member A2                             | -2.19 | 0.0149 |
| SNRPA1   | small nuclear ribonucleoprotein polypeptide A'                            | -2.18 | 0.0340 |
| C13orf34 | chromosome 13 open reading frame 34                                       | -2.18 | 0.0439 |
| SUZ12    | suppressor of zeste 12 homolog                                            | -2.18 | 0.0354 |
| CFL2     | cofilin 2                                                                 | -2.18 | 0.0415 |
| MTPN     | myotrophin                                                                | -2.18 | 0.0140 |
| NUDT21   | nudix-type motif 21                                                       | -2.18 | 0.0158 |
| SNX25    | sorting nexin 25                                                          | -2.17 | 0.0144 |
| ZNF828   | zinc finger protein 828                                                   | -2.17 | 0.0125 |
| EIF3J    | eukaryotic translation initiation factor 3,<br>subunit J                  | -2.17 | 0.0122 |

|          |                                                              |       |        |
|----------|--------------------------------------------------------------|-------|--------|
| OXNAD1   | oxidoreductase NAD-binding domain<br>containing 1            | -2.17 | 0.0105 |
| AEBP2    | AE binding protein 2                                         | -2.16 | 0.0158 |
| AHCYL1   | adenosylhomocysteinase-like 1                                | -2.15 | 0.0296 |
| ITSN1    | intersectin 1                                                | -2.15 | 0.0277 |
| UGCG     | UDP-glucose ceramide glucosyltransferase                     | -2.15 | 0.0147 |
| LAMC2    | laminin, gamma 2                                             | -2.14 | 0.0156 |
| CLTC     | clathrin, heavy chain                                        | -2.14 | 0.0114 |
| MAP2K4   | mitogen-activated protein kinase kinase 4                    | -2.14 | 0.0181 |
| C15orf52 | chromosome 15 open reading frame 52                          | -2.14 | 0.0126 |
| EXO1     | exonuclease 1                                                | -2.14 | 0.0275 |
| ASF1A    | ASF1 anti-silencing function 1 homolog A                     | -2.13 | 0.0250 |
| CHCHD4   | coiled-coil-helix-coiled-coil-helix domain<br>containing 4   | -2.12 | 0.0140 |
| GUF1     | GUF1 GTPase homolog                                          | -2.12 | 0.0322 |
| PDGFC    | platelet derived growth factor C                             | -2.12 | 0.0114 |
| ADSS     | adenylosuccinate synthase                                    | -2.11 | 0.0105 |
| NUP54    | nucleoporin 54kDa                                            | -2.11 | 0.0276 |
| TFAM     | transcription factor A, mitochondrial                        | -2.11 | 0.0180 |
| SPCS3    | signal peptidase complex subunit 3 homolog                   | -2.11 | 0.0243 |
| DR1      | down-regulator of transcription 1, TBP-binding               | -2.11 | 0.0189 |
| B3GALNT1 | beta-1,3-N-acetylgalactosaminyltransferase 1                 | -2.10 | 0.0398 |
| C6orf182 | chromosome 6 open reading frame 182                          | -2.10 | 0.0105 |
| CAV1     | caveolin 1, caveolae protein, 22kDa                          | -2.10 | 0.0210 |
| TMED5    | transmembrane emp24 protein transport<br>domain containing 5 | -2.10 | 0.0178 |
| SH3GLB1  | SH3-domain GRB2-like endophilin B1                           | -2.10 | 0.0114 |
| PAQR3    | progesterone and adipoQ receptor family member<br>III        | -2.10 | 0.0113 |
| SH3PXD2A | SH3 and PX domains 2A                                        | -2.10 | 0.0114 |
| KCTD12   | potassium channel tetramerisation domain<br>containing 12    | -2.09 | 0.0284 |
| NLK      | nemo-like kinase                                             | -2.09 | 0.0166 |
| UBLCP1   | ubiquitin-like domain containing CTD<br>phosphatase 1        | -2.09 | 0.0142 |
| CEPT1    | choline/ethanolamine phosphotransferase 1                    | -2.08 | 0.0262 |



|         |                                                                                             |       |        |
|---------|---------------------------------------------------------------------------------------------|-------|--------|
| ITGB4   | integrin, beta 4                                                                            | -2.07 | 0.0193 |
| NUMB    | numb homolog                                                                                | -2.07 | 0.0122 |
| PDHA1   | pyruvate dehydrogenase alpha 1                                                              | -2.06 | 0.0144 |
| BOD1L   | biorientation of chromosomes in cell division<br>1-like                                     | -2.06 | 0.0150 |
| C3orf23 | chromosome 3 open reading frame 23                                                          | -2.06 | 0.0182 |
| TIMM8A  | translocase of inner mitochondrial membrane<br>8 homolog A                                  | -2.06 | 0.0340 |
| TNPO3   | transportin 3                                                                               | -2.06 | 0.0142 |
| DNAJC2  | DnaJ homolog, subfamily C, member 2                                                         | -2.05 | 0.0191 |
| AKIRIN1 | akirin 1                                                                                    | -2.05 | 0.0234 |
| ARL2BP  | ADP-ribosylation factor-like 2 binding protein                                              | -2.05 | 0.0216 |
| SPAG16  | sperm associated antigen 16                                                                 | -2.04 | 0.0182 |
| CLCN3   | Chloride channel 3                                                                          | -2.03 | 0.0153 |
| DEK     | DEK oncogene                                                                                | -2.03 | 0.0361 |
| RAP2A   | RAP2A, member of RAS oncogene family                                                        | -2.03 | 0.0264 |
| RALB    | v-ral simian leukemia viral oncogene homolog<br>B                                           | -2.02 | 0.0114 |
| C1GALT1 | core 1 synthase, glycoprotein-N-<br>acetylgalactosamine 3-beta-<br>galactosyltransferase, 1 | -2.02 | 0.0407 |
| GAR1    | GAR1 ribonucleoprotein homolog                                                              | -2.01 | 0.0114 |
| NLE1    | notchless homolog 1                                                                         | -2.01 | 0.0114 |
| CCDC59  | coiled-coil domain containing 59                                                            | -2.01 | 0.0114 |
| ROCK2   | Rho-associated, coiled-coil containing protein<br>kinase 2                                  | -2.01 | 0.0296 |
| METTL2A | methyltransferase like 2A                                                                   | -2.01 | 0.0144 |
| GBP3    | guanylate binding protein 3                                                                 | -2.01 | 0.0177 |
| SLC35D1 | solute carrier family 35, member D1                                                         | -2.01 | 0.0225 |
| UCHL3   | ubiquitin carboxyl-terminal esterase L3                                                     | -2.01 | 0.0386 |
| ATPAF1  | ATP synthase mitochondrial F1 complex<br>assembly factor 1                                  | -2.01 | 0.0153 |
| TMEM9B  | TMEM9 domain family, member B                                                               | -2.01 | 0.0113 |
| HNRNPA0 | heterogeneous nuclear ribonucleoprotein A0                                                  | -2.01 | 0.0413 |
| USP14   | ubiquitin specific peptidase 14                                                             | -2.01 | 0.0309 |
