# Supplementary material for: Possible Role of miR-375-3p in Cervical Lymph Node Metastasis of Oral Squamous Cell Carcinoma
Source: MDPI journal article supplement (doi:10.3390/cancers16081492), 2024-04-13
Supplement: s1 [file s1]

**Table S6.** Target gene candidates of miR-375-3p in human oral squamous cell carcinoma cells.

| Gene symbol | Gene name                                                          | Fold change | <i>P</i> -value |
|-------------|--------------------------------------------------------------------|-------------|-----------------|
| QKI         | quaking homolog, KH domain RNA binding                             | -9.93       | 0.0114          |
| MTDH        | metadherin                                                         | -6.55       | 0.0202          |
| YAP1        | Yes-associated protein 1                                           | -5.54       | 0.0114          |
| CBX3        | chromobox homolog 3                                                | -4.91       | 0.0119          |
| CHSY1       | chondroitin sulfate synthase 1                                     | -4.84       | 0.0105          |
| MAPKAP1     | mitogen-activated protein kinase-associated<br>protein 1           | -4.51       | 0.0140          |
| LDHB        | lactate dehydrogenase B                                            | -4.24       | 0.0142          |
| UBE2E2      | ubiquitin-conjugating enzyme E2E2                                  | -4.17       | 0.0105          |
| USP1        | ubiquitin-specific peptidase 1                                     | -3.81       | 0.0226          |
| C10orf26    | chromosome 10 open reading frame 26                                | -3.72       | 0.0114          |
| LSM12       | LSM12 homolog                                                      | -3.57       | 0.0119          |
| PLEKHA3     | pleckstrin homology domain containing, family<br>A member 3        | -3.48       | 0.0105          |
| EBPL        | emopamil binding protein-like                                      | -3.42       | 0.0142          |
| OGFOD1      | 2-oxoglutarate and iron-dependent oxygenase<br>domain containing 1 | -3.18       | 0.0114          |
| CORO2A      | coronin, actin binding protein, 2A                                 | -3.08       | 0.0245          |
| PTPMT1      | protein tyrosine phosphatase, mitochondrial 1                      | -2.93       | 0.0181          |

|          |                                                                 |       |        |
|----------|-----------------------------------------------------------------|-------|--------|
| CSTF2    | cleavage stimulation factor, 3' pre-RNA, subunit<br>2, 64kDa    | -2.92 | 0.0156 |
| POC1B    | POC1 centriolar protein homolog B                               | -2.89 | 0.0122 |
| EIF4G3   | eukaryotic translation initiation factor 4 gamma,<br>3          | -2.88 | 0.0105 |
| PPPDE2   | PPPDE peptidase domain containing 2                             | -2.76 | 0.0144 |
| C1QBP    | complement component 1, q subcomponent<br>binding protein       | -2.68 | 0.0179 |
| RPN1     | ribophorin I                                                    | -2.67 | 0.0286 |
| MBD2     | methyl-CpG binding domain protein 2                             | -2.63 | 0.0134 |
| DCUN1D4  | DCN1, defective in cullin neddylation 1, domain<br>containing 4 | -2.55 | 0.0142 |
| TMEM55A  | transmembrane protein 55A                                       | -2.45 | 0.0114 |
| ARL4C    | ADP-ribosylation factor-like 4C                                 | -2.40 | 0.0114 |
| PRDX1    | peroxiredoxin 1                                                 | -2.30 | 0.0144 |
| KIAA1524 | KIAA1524                                                        | -2.25 | 0.0344 |
| MOBK1B   | MOB1, Mps One Binder kinase activator-like 1B                   | -2.21 | 0.0114 |
| CNN3     | calponin 3, acidic                                              | -2.19 | 0.0344 |
| ASF1A    | ASF1 anti-silencing function 1 homolog A                        | -2.13 | 0.0250 |
| PDGFC    | platelet-derived growth factor C                                | -2.12 | 0.0114 |
| PAQR3    | progesterone and adipoQ receptor family member<br>III           | -2.10 | 0.0113 |

|        |                                                            |       |        |
|--------|------------------------------------------------------------|-------|--------|
| CEPT1  | choline/ethanolamine phosphotransferase 1                  | -2.08 | 0.0262 |
| TIMM8A | translocase of inner mitochondrial membrane 8<br>homolog A | -2.06 | 0.0340 |
| DEK    | DEK oncogene                                               | -2.03 | 0.0361 |
| ATPAF1 | ATP synthase mitochondrial F1 complex<br>assembly factor 1 | -2.01 | 0.0153 |
