# Supplementary material for: Possible Role of miR-375-3p in Cervical Lymph Node Metastasis of Oral Squamous Cell Carcinoma
Source: MDPI journal article supplement (doi:10.3390/cancers16081492), 2024-04-13
Supplement: s1 [file s1]

**Table S1.** Clinicopathological parameters of patients with oral squamous cell carcinoma in this study.

| Parameter       | No recurrence<br>(n=15) | Nodal relapse<br>(n=15) | <i>P</i> -value |
|-----------------|-------------------------|-------------------------|-----------------|
| Age             |                         |                         | 0.4889          |
| Median (Range)  | 60 (48-91)              | 71 (37-88)              |                 |
| Gender          |                         |                         | 0.4642          |
| Male            | 9                       | 7                       |                 |
| Female          | 6                       | 8                       |                 |
| Primary site    |                         |                         |                 |
| Tongue          | 15                      | 15                      |                 |
| Differentiation |                         |                         | 0.0393          |
| G 1             | 11                      | 6                       |                 |
| G 2             | 4                       | 4                       |                 |
| G 3             | 0                       | 5                       |                 |
| Clinical stage  |                         |                         | 0.2733          |
| Stage I         | 9                       | 6                       |                 |
| Stage II        | 6                       | 9                       |                 |
